# Supplementary material
Source: publisher figshare collection journal article supplement (https://sage.figshare.com/ndownloader/files/16406816)
Supplement: Supplementary file 1 [file 16406816]

## Supplementary Figures

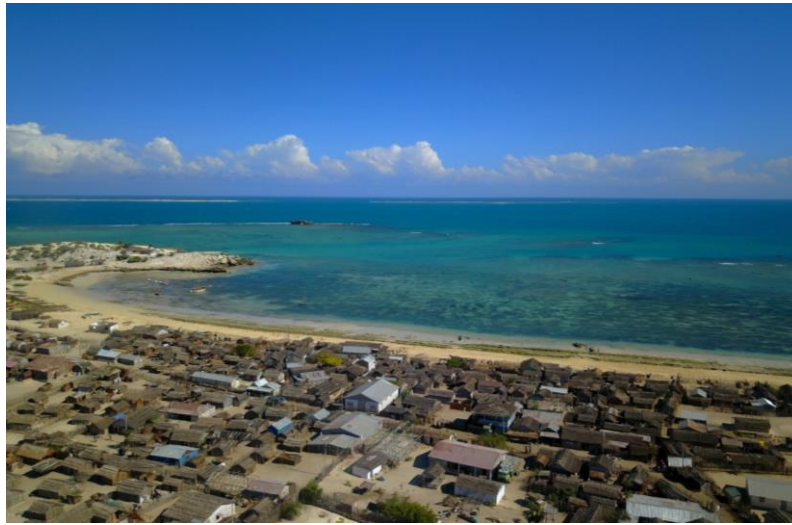

Figure S1: Village of Andavadoake, MAP base, Velondriake Marine Protected Area, Madagascar.

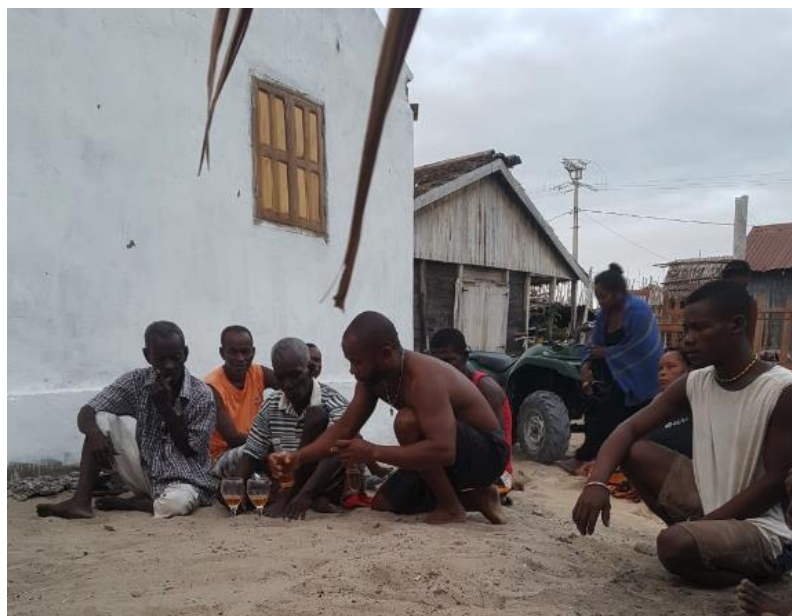

Figure S2: *Olo Be* perform a blessing and libation to the *Razana*.

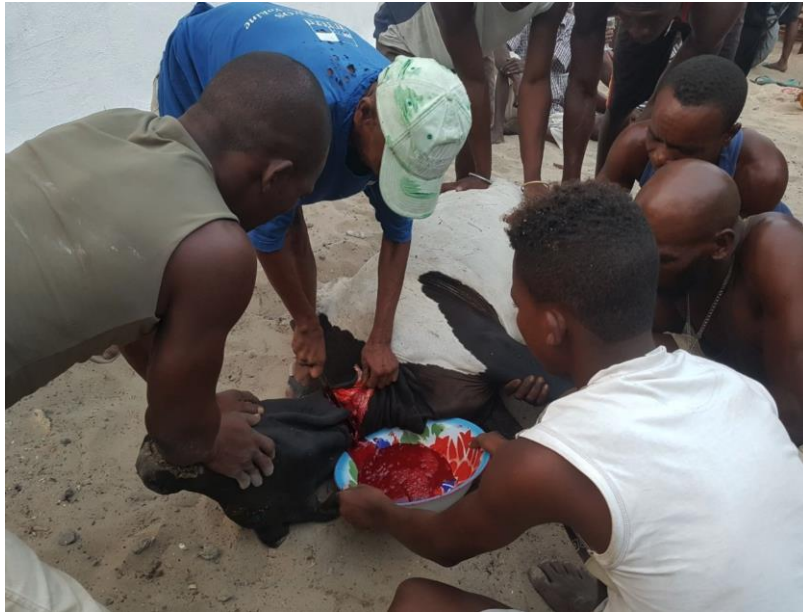

Figure S3: Zebu sacrifice to the *Razana* in thanks for the successful conclusion of the MAP 2017-2018 oral history survey of Velondriake.

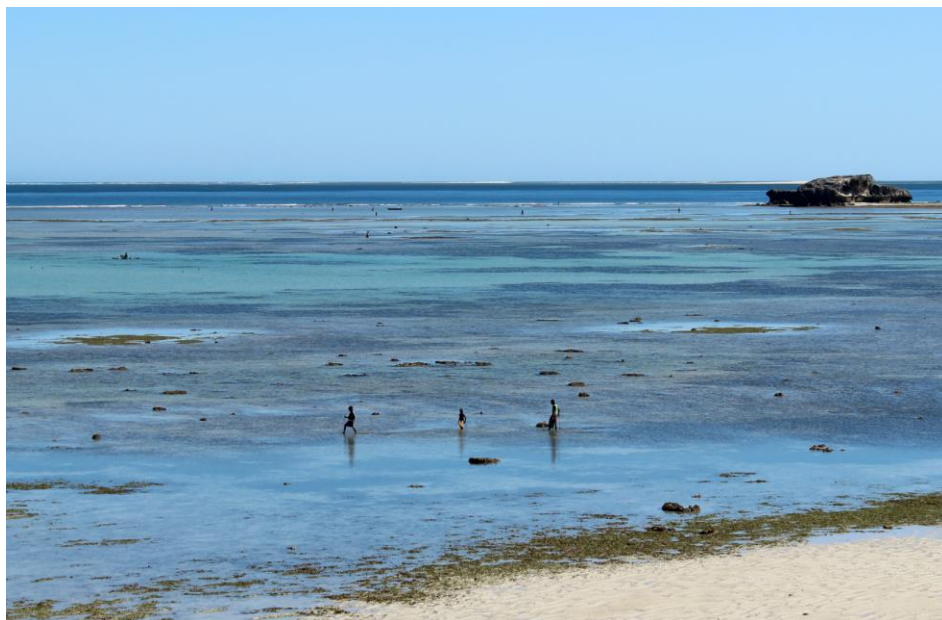

Figure S4: Vezo women gleaning for shellfish and other resources at low tide.



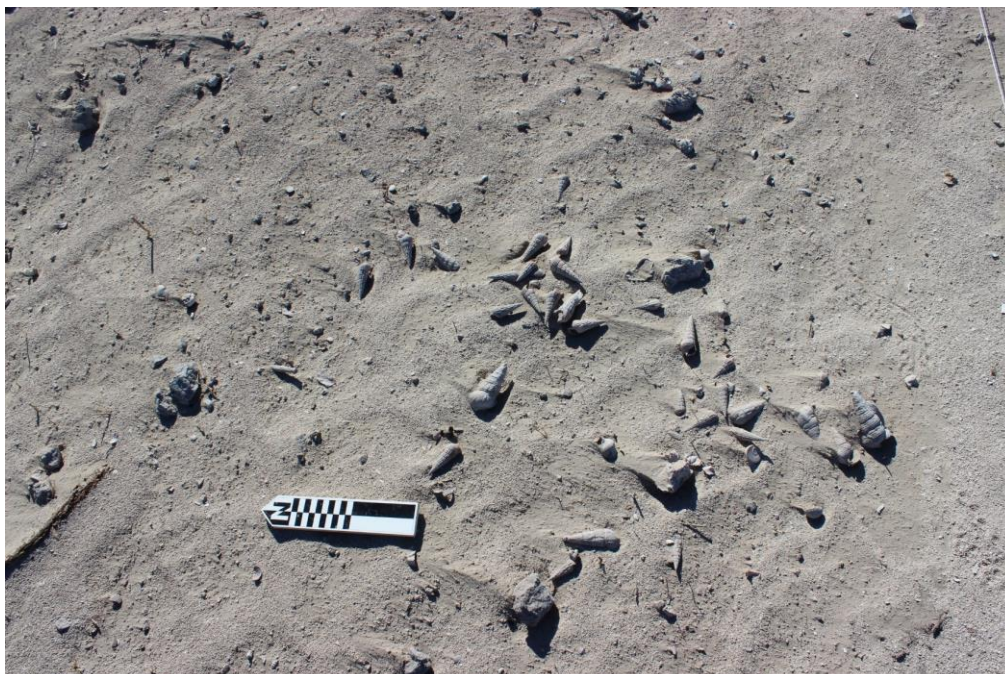

Figure S5: Concentration of archaeological shellfish in Velondriake.

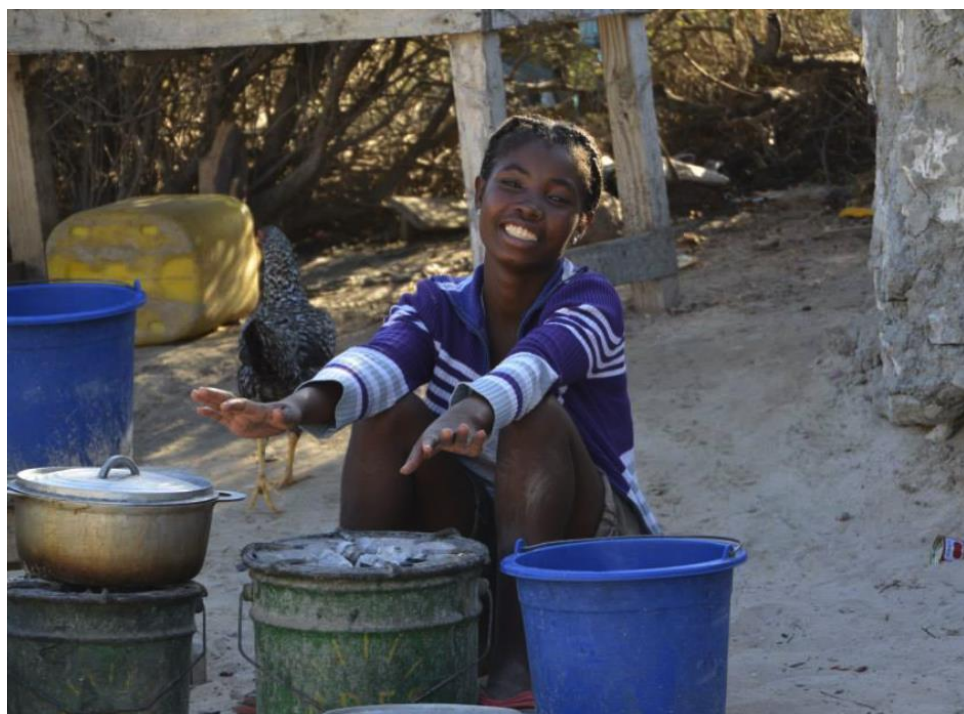

Figure S6: PS cooks rice on charcoal stoves while discussing the day's archaeological finds.



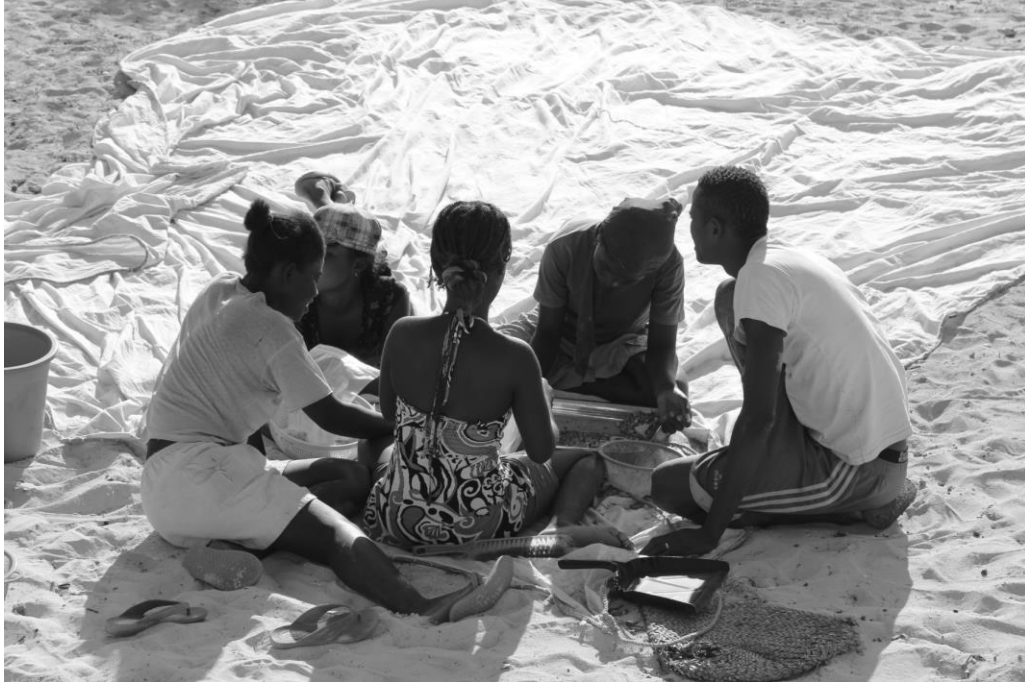

Figure S7: MAP team sorts shellfish remains at the site of Antsaragnangany using a *lakalay* (boat sail) as a lab bench.

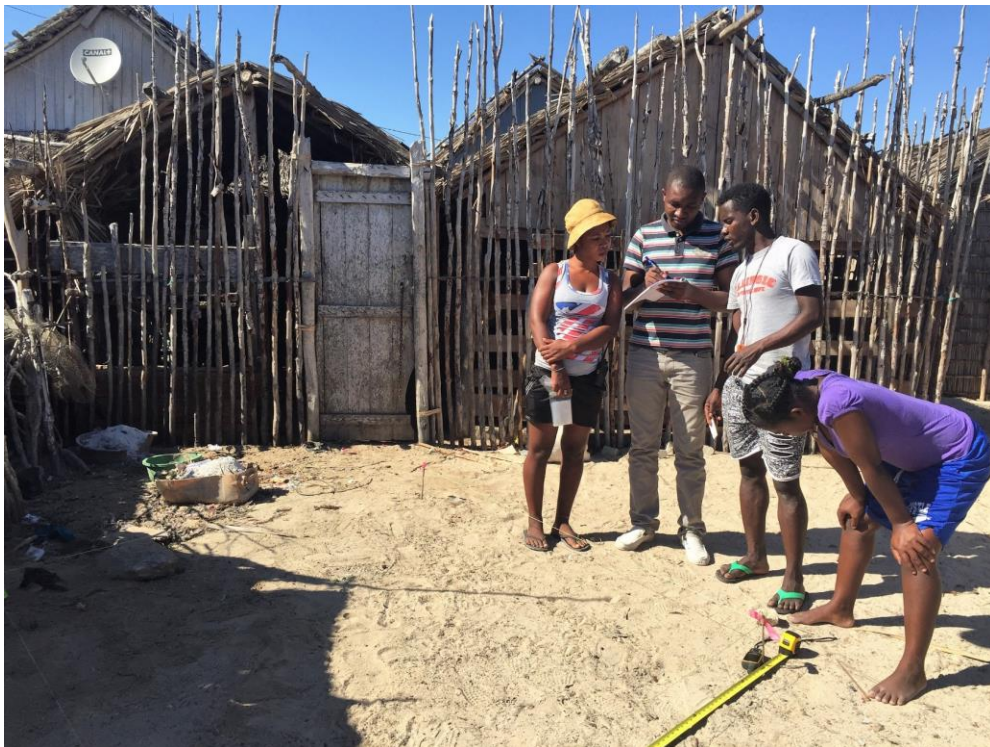

Figure S8: A group of fish workshop participants set up their collection site to carry out an ethnoarchaeology study.

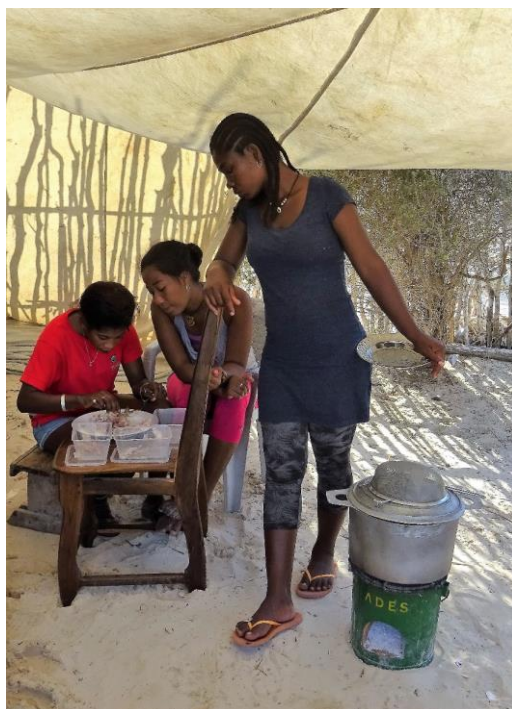

Figure S9: MAP team members boil fish using an *adesy* and remove flesh from a fish skeleton as they prepare collection specimens under the shade of the MAP *lakalay* (boat sail).

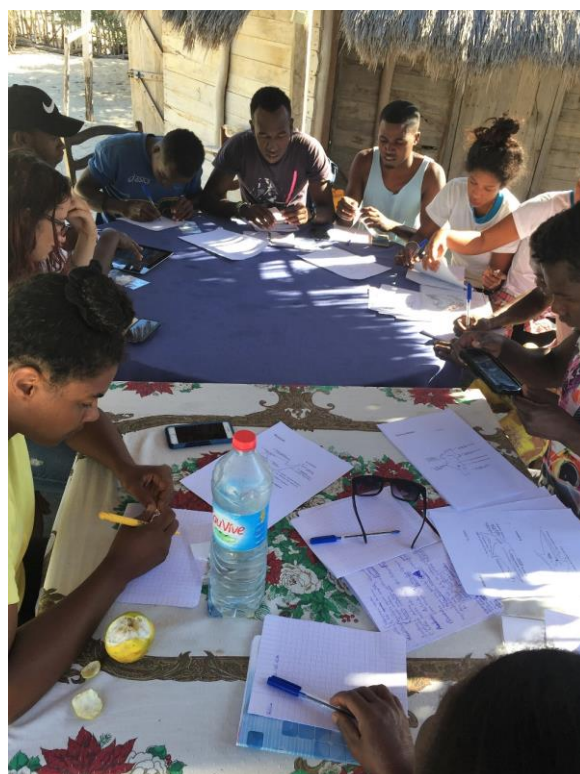

Figure S10: Fish workshop participants study for a fish bone quiz.



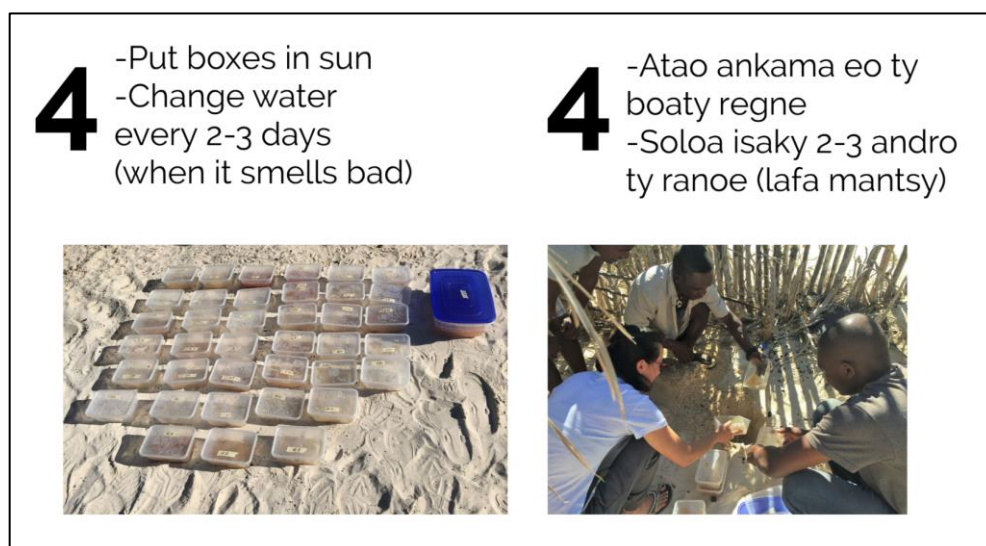

Figure S11: A page out of the MAP comparative fish bone collection manual with instructions in English and Vezo and illustrations from the 2018 workshop.

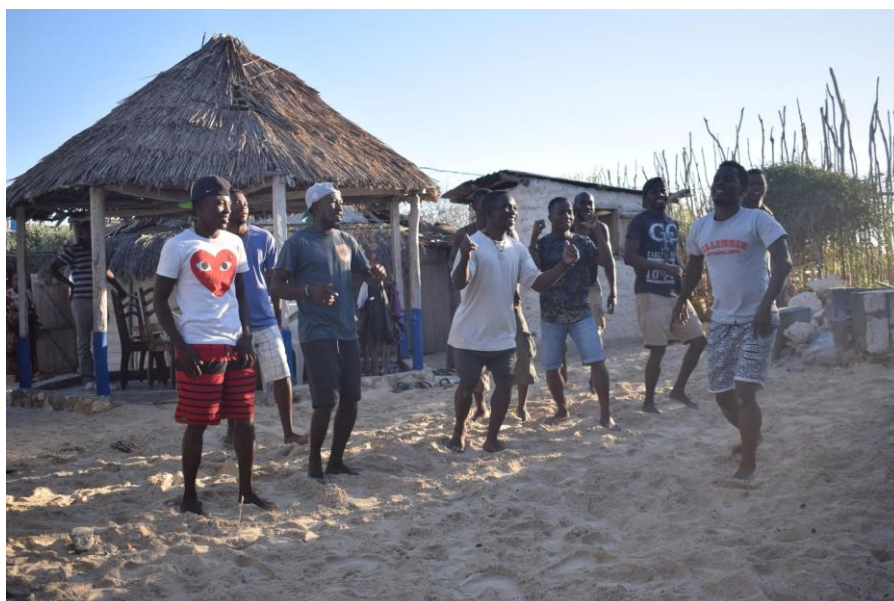

Figure S12: MAP team rehearsing original song about archaeology and the MAP composed by BVP.

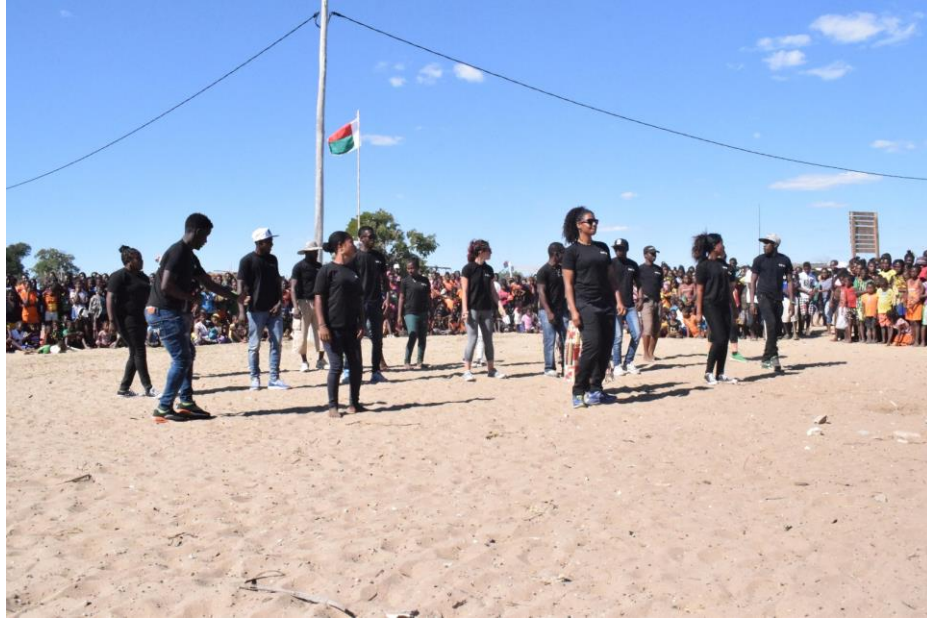

Figure S13: MAP team stands before the Mayor and other officials in Befandefa for their Malagasy Independence Day performance on June 26th, 2018.

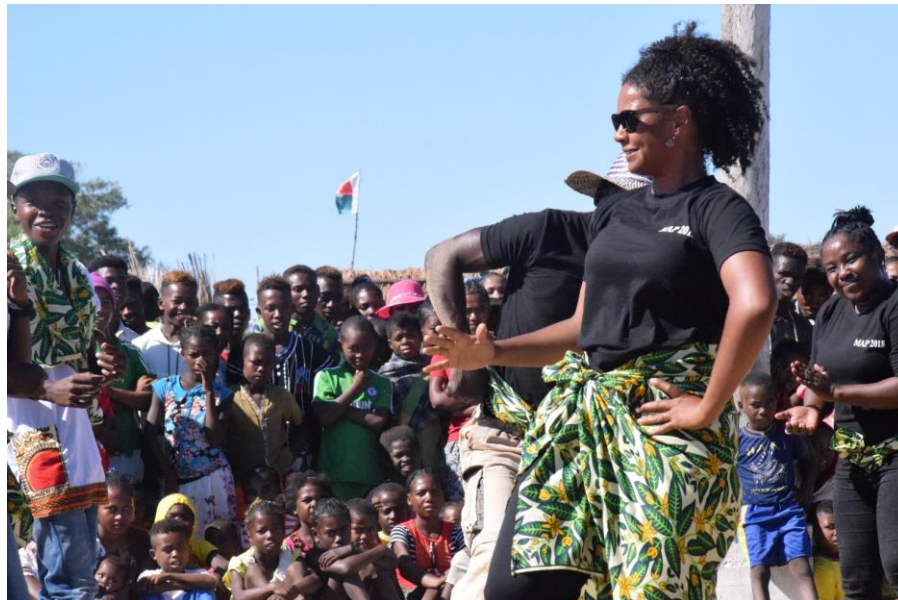

Figure S14: MAP team performs original song by BVP and dance choreography for Independence Day.
